# Supplementary material
Source: ML conference proceedings conference paper supplement (https://proceedings.mlr.press/v38/vanhoof15.html)
Supplement: Supplementary file 1 [file vanhoof15-supp.pdf]

# Appendix

Herke van Hoof<sup>‡</sup>

Jan Peters<sup>‡\*</sup>

Gerhard Neumann<sup>‡</sup>

<sup>‡</sup>TU Darmstadt, Computer Science Department. <sup>\*</sup>MPI for Intelligent Systems.

## 1 Derivation of REPS Solution

We start out with the constrained optimization problem

$$\max_{\pi, \mu_\pi} J(\pi) = \max_{\pi, \mu_\pi} \iint_{A \times S} \pi(\mathbf{a}|\mathbf{s}) \mu_\pi(\mathbf{s}) \mathcal{R}_s^{\mathbf{a}} d\mathbf{a} d\mathbf{s} \quad (1)$$

$$s.t. \quad \iint_{A \times S} \pi(\mathbf{a}|\mathbf{s}) \mu_\pi(\mathbf{s}) d\mathbf{a} d\mathbf{s} = 1 \quad (2)$$

$$\forall s' \quad \iint_{A \times S} \pi(\mathbf{a}|\mathbf{s}) \mu_\pi(\mathbf{s}) \mathcal{P}_{ss'}^{\mathbf{a}} d\mathbf{a} d\mathbf{s} = \mu_\pi(s') \quad (3)$$

$$\iint_{A \times S} \pi(\mathbf{a}|\mathbf{s}) \mu_\pi(\mathbf{s}) \log \frac{\pi(\mathbf{a}|\mathbf{s}) \mu_\pi(\mathbf{s})}{q(\mathbf{s}, \mathbf{a})} d\mathbf{a} d\mathbf{s} \leq \epsilon. \quad (4)$$

For every constraint, we introduce a Lagrangian multiplier. Because (3) represents a continuum of constraints, we integrate over the value of this constraint multiplied by a state-dependent Lagrangian multiplier  $V(\mathbf{s})$ . We will write  $p(\mathbf{s}, \mathbf{a}) = \pi(\mathbf{a}|\mathbf{s}) \mu_\pi(\mathbf{s})$  to keep the exposition brief. Therefore, the Lagrangian

$$\begin{aligned} L(p, \eta, V, \lambda) &= \iint_{A \times S} p(\mathbf{s}, \mathbf{a}) \mathcal{R}_s^{\mathbf{a}} d\mathbf{a} d\mathbf{s} \\ &\quad + \lambda \left( 1 - \iint_{A \times S} p(\mathbf{s}, \mathbf{a}) d\mathbf{a} d\mathbf{s} \right) \\ &\quad + \int_S V(s') \left( \iint_{A \times S} p(\mathbf{s}, \mathbf{a}) \mathcal{P}_{ss'}^{\mathbf{a}} d\mathbf{a} d\mathbf{s} - \mu_\pi(s') \right) ds' \\ &\quad + \eta \left( \epsilon - \iint_{A \times S} p(\mathbf{s}, \mathbf{a}) \log \frac{p(\mathbf{s}, \mathbf{a})}{q(\mathbf{s}, \mathbf{a})} d\mathbf{a} d\mathbf{s} \right). \end{aligned}$$

The Lagrangian can be re-shaped, using  $\mu_\pi(\mathbf{s}) = \int_A p(\mathbf{s}, \mathbf{a}) d\mathbf{a}$ , in the more convenient form

$$\begin{aligned} L(p, \eta, V, \lambda) &= \lambda - \mathbb{E}_{p(\mathbf{s}, \mathbf{a})} [V(\mathbf{s})] + \eta \epsilon \\ &\quad + \mathbb{E}_{p(\mathbf{s}, \mathbf{a})} \left[ \mathcal{R}_s^{\mathbf{a}} - \lambda + \int_S V(s') \mathcal{P}_{ss'}^{\mathbf{a}} ds' - \eta \log \frac{p(\mathbf{s}, \mathbf{a})}{q(\mathbf{s}, \mathbf{a})} \right]. \end{aligned}$$

To find the optimal  $p$ , we take the derivative of  $L$  w.r.t.  $p$  and set it to zero

$$\begin{aligned} 0 &= \frac{\partial L}{\partial p(\mathbf{s}, \mathbf{a})} \\ &= \mathcal{R}_s^{\mathbf{a}} - \lambda + \int_S V(s') \mathcal{P}_{ss'}^{\mathbf{a}} ds' - \eta \log \frac{p(\mathbf{s}, \mathbf{a})}{q(\mathbf{s}, \mathbf{a})} - \eta - V(\mathbf{s}) \end{aligned}$$

therefore,

$$\eta \log \frac{p(\mathbf{s}, \mathbf{a})}{q(\mathbf{s}, \mathbf{a})} = \mathcal{R}_s^{\mathbf{a}} - \lambda + \int_S V(s') \mathcal{P}_{ss'}^{\mathbf{a}} ds' - \eta - V(\mathbf{s})$$

$$\begin{aligned} p(\mathbf{s}, \mathbf{a}) &= q(\mathbf{s}, \mathbf{a}) \exp \left( \frac{\mathcal{R}_s^{\mathbf{a}} - \int_S V(s') \mathcal{P}_{ss'}^{\mathbf{a}} ds' - V(\mathbf{s})}{\eta} \right) \\ &\quad \cdot \exp \left( \frac{-\lambda - \eta}{\eta} \right) \\ &\propto q(\mathbf{s}, \mathbf{a}) \exp \left( \frac{\mathcal{R}_s^{\mathbf{a}} - \int_S V(s') \mathcal{P}_{ss'}^{\mathbf{a}} ds' - V(\mathbf{s})}{\eta} \right). \end{aligned}$$

The function  $V(\mathbf{s})$  resembles a value function, so that  $\delta(\mathbf{s}, \mathbf{a}, V) = \mathcal{R}_s^{\mathbf{a}} - \int_S V(s') \mathcal{P}_{ss'}^{\mathbf{a}} ds' - V(\mathbf{s})$  can be identified as a Bellman error. Since  $p(\mathbf{s}, \mathbf{a})$  is a probability distribution we can identify  $\exp(-\lambda/\eta - 1)$  to be a normalization factor

$$\begin{aligned} Z^{-1} &= \left( \iint_{A \times S} q(\mathbf{s}, \mathbf{a}) \exp(\delta(\mathbf{s}, \mathbf{a}, V)/\eta) d\mathbf{a} d\mathbf{s} \right)^{-1} \\ &= \left( \mathbb{E}_{q(\mathbf{s}, \mathbf{a})} \exp(\delta(\mathbf{s}, \mathbf{a}, V)/\eta) \right)^{-1}. \end{aligned}$$

## 2 The Dual and its Derivatives

We can re-insert the state-action probabilities in the Lagrangian to obtain the dual

$$\begin{aligned}
 g(\eta, V, \lambda) &= \lambda + \eta\epsilon \\
 &+ \mathbb{E}_{p(\mathbf{s}, \mathbf{a})} \left[ \delta(\mathbf{s}, \mathbf{a}, V) - \lambda - \eta \log \frac{p(\mathbf{s}, \mathbf{a})}{q(\mathbf{s}, \mathbf{a})} \right] \\
 &= \lambda + \eta\epsilon + \mathbb{E}_{p(\mathbf{s}, \mathbf{a})} [-\lambda + \lambda] \\
 &\quad + \mathbb{E}_{p(\mathbf{s}, \mathbf{a})} [\delta(\mathbf{s}, \mathbf{a}, V) - \delta(\mathbf{s}, \mathbf{a}, V) + \eta] \\
 &= \lambda + \eta\epsilon + \mathbb{E}_{p(\mathbf{s}, \mathbf{a})} \eta \text{ dads} \\
 &= \lambda + \eta\epsilon + \eta = \eta\epsilon + \eta \log(Z) \\
 &= \eta\epsilon + \eta \log(\mathbb{E}_{q(\mathbf{s}, \mathbf{a})} \exp(\delta(\mathbf{s}, \mathbf{a}, V)/\eta)),
 \end{aligned}$$

where we used the identity

$$\begin{aligned}
 \exp(-\lambda/\eta - 1) &= Z^{-1} \\
 \lambda + \eta &= \eta \log(Z).
 \end{aligned}$$

The expected value over  $q$  can straightforwardly be approximated by taking the average of samples  $1, \dots, n$  taken from  $q$ . Note that  $\lambda$  and  $q$  do not appear in the final expression.

$$g(\eta, V) = \eta\epsilon + \eta \log \left( \frac{1}{n} \sum_{i=1}^n \exp(\delta(\mathbf{s}_i, \mathbf{a}_i, V)/\eta) \right).$$

When employing the kernel embedding, the Bellman error is written as

$$\delta(\mathbf{s}_i, \mathbf{a}_i, \boldsymbol{\alpha}) = \mathcal{R}_{\mathbf{s}_i}^{\mathbf{a}_i} + \boldsymbol{\alpha}^T (\mathbf{K}\beta(\mathbf{s}_i, \mathbf{a}_i) - \mathbf{k}_s(\mathbf{s}_i)).$$

We define

$$w_i = \frac{\exp(\delta(\mathbf{s}_i, \mathbf{a}_i, \boldsymbol{\alpha})/\eta)}{\sum_{i=j}^n \exp(\delta(\mathbf{s}_j, \mathbf{a}_j, \boldsymbol{\alpha})/\eta)}$$

to keep equations brief and readable. The partial derivatives can be written as:

$$\begin{aligned}
 \frac{\partial g(\eta, \boldsymbol{\alpha})}{\partial \eta} &= -\frac{1}{\eta} \sum_{i=1}^n w_i \delta(\mathbf{s}_i, \mathbf{a}_i, \boldsymbol{\alpha}) + \epsilon \\
 &\quad + \log \left( \frac{1}{n} \sum_{i=1}^n \exp(\delta(\mathbf{s}_i, \mathbf{a}_i, \boldsymbol{\alpha})/\eta) \right),
 \end{aligned}$$

$$\frac{\partial g(\eta, \boldsymbol{\alpha})}{\partial \boldsymbol{\alpha}} = \sum_{i=1}^n w_i (\mathbf{K}\beta(\mathbf{s}_i, \mathbf{a}_i) - \mathbf{k}_s(\mathbf{s}_i)),$$

and furthermore, for the Hessian we obtain

$$\begin{aligned}
 \frac{\partial^2 g(\eta, \boldsymbol{\alpha})}{\partial \eta \partial \eta} &= \frac{1}{\eta} \sum_{i=1}^n w_i (\delta(\mathbf{s}_i, \mathbf{a}_i, \boldsymbol{\alpha}))^2 \\
 &\quad - \frac{1}{\eta} \left( \sum_{i=1}^n w_i \delta(\mathbf{s}_i, \mathbf{a}_i, \boldsymbol{\alpha}) \right)^2
 \end{aligned}$$

$$\frac{\partial^2 g(\eta, \boldsymbol{\alpha})}{\partial \boldsymbol{\alpha} \partial \boldsymbol{\alpha}^T} = -\frac{1}{\eta} \sum_{i=1}^n w_i (\mathbf{K}\beta(\mathbf{s}_i, \mathbf{a}_i) - \mathbf{k}_s(\mathbf{s}_i))$$

$$\cdot \sum_{i=1}^n w_i (\mathbf{K}\beta(\mathbf{s}_i, \mathbf{a}_i) - \mathbf{k}_s(\mathbf{s}_i))^T +$$

$$\sum_{i=1}^n \frac{w_i}{\eta} (\mathbf{K}\beta(\mathbf{s}_i, \mathbf{a}_i) - \mathbf{k}_s(\mathbf{s}_i)) (\mathbf{K}\beta(\mathbf{s}_i, \mathbf{a}_i) - \mathbf{k}_s(\mathbf{s}_i))^T,$$

$$\frac{\partial^2 g(\eta, \boldsymbol{\alpha})}{\partial \eta \partial \boldsymbol{\alpha}} = -\frac{1}{\eta} \sum_{i=1}^n w_i (\mathbf{K}\beta(\mathbf{s}_i, \mathbf{a}_i) - \mathbf{k}_s(\mathbf{s}_i))$$

$$+ \sum_{i=1}^n \frac{w_i}{\eta} \delta(\mathbf{s}_i, \mathbf{a}_i, \boldsymbol{\alpha}) \sum_{i=1}^n w_i (\mathbf{K}\beta(\mathbf{s}_i, \mathbf{a}_i) - \mathbf{k}_s(\mathbf{s}_i))$$

$$+ \frac{1}{\eta} \sum_{i=1}^n w_i (\mathbf{K}\beta(\mathbf{s}_i, \mathbf{a}_i) - \mathbf{k}_s(\mathbf{s}_i))$$

$$- \frac{1}{\eta} \sum_{i=1}^n w_i \delta(\mathbf{s}_i, \mathbf{a}_i, \boldsymbol{\alpha}) (\mathbf{K}\beta(\mathbf{s}_i, \mathbf{a}_i) - \mathbf{k}_s(\mathbf{s}_i))$$

### 3 Fitting a Generalizing Policy to State-Action Samples

To fit a generalizing policy  $\tilde{\pi}(\mathbf{a}|\mathbf{s};\boldsymbol{\theta})$  to the samples-based policy  $p(\mathbf{s}_i, \mathbf{a}_i) = \pi(\mathbf{a}_i|\mathbf{s}_i)\mu_\pi(\mathbf{s}_i)$  (defined only on samples  $i \in \{1, \dots, n\}$ ), we minimize the expected Kullback-Leibler divergence

$$\begin{aligned} \boldsymbol{\theta}^* &= \arg \min_{\boldsymbol{\theta}} \mathbb{E}_{\mu_\pi(\mathbf{s})} \text{KL}(\pi(\mathbf{a}|\mathbf{s}) || \tilde{\pi}(\mathbf{a}|\mathbf{s})) \\ &= \int_S \mu_\pi(\mathbf{s}) \int_A \pi(\mathbf{a}|\mathbf{s}) \log \frac{\pi(\mathbf{a}|\mathbf{s})}{\tilde{\pi}(\mathbf{a}|\mathbf{s};\boldsymbol{\theta})} d\mathbf{a} d\mathbf{s}. \end{aligned}$$

This is a standard objective for matching two distributions. Note that the alternative Kullback-Leibler divergence  $\text{KL}(\tilde{\pi}(\mathbf{a}|\mathbf{s}) || \pi(\mathbf{a}|\mathbf{s}))$  is undefined since  $\pi(\mathbf{a}|\mathbf{s})$  is 0 at most places. Since the contribution to the integral is 0 for any  $(\mathbf{s}, \mathbf{a}) \notin \{(\mathbf{s}_1, \mathbf{a}_1), \dots, (\mathbf{s}_n, \mathbf{a}_n)\}$ , we can equivalently write:

$$\begin{aligned} \boldsymbol{\theta}^* &= \arg \min_{\boldsymbol{\theta}} \sum_{i=1}^n \mu_\pi(\mathbf{s}_i) \pi(\mathbf{a}_i|\mathbf{s}_i) \log \frac{\pi(\mathbf{a}_i|\mathbf{s}_i)}{\tilde{\pi}(\mathbf{a}_i|\mathbf{s}_i;\boldsymbol{\theta})} \\ &= \arg \min_{\boldsymbol{\theta}} \sum_{i=1}^n \mu_\pi(\mathbf{s}_i) \pi(\mathbf{a}_i|\mathbf{s}_i) \log \frac{1}{\tilde{\pi}(\mathbf{a}_i|\mathbf{s}_i;\boldsymbol{\theta})} \\ &\quad + \sum_{i=1}^n \mu(\mathbf{s}_i) \pi(\mathbf{a}_i|\mathbf{s}_i) \log(\pi(\mathbf{a}_i|\mathbf{s}_i)) \\ &= \arg \max_{\boldsymbol{\theta}} \sum_{i=1}^n \mu_\pi(\mathbf{s}_i) \pi(\mathbf{a}_i|\mathbf{s}_i) \log \tilde{\pi}(\mathbf{a}_i|\mathbf{s}_i;\boldsymbol{\theta}) \end{aligned}$$

where we used the fact that we can subtract terms constant in  $\boldsymbol{\theta}$  and apply monotonously increasing functions to the terms to be minimized without changing the location of the minimum. Note that the final result is simply a weighted maximum-likelihood estimate of  $\boldsymbol{\theta}$ . This result can be used to fit a parametric policy, or, as we demonstrate in the main material, a non-parametric policy to the weighted samples.

### 4 Optimization with Respect to $V$

In order to show that we can minimize the dual function  $g$ , we need to show that the optimal solution of the value function has the following form

$$V^* = \sum_{\tilde{\mathbf{s}} \in \tilde{\mathcal{S}}} \alpha_{\tilde{\mathbf{s}}} k_{\tilde{\mathbf{s}}}(\tilde{\mathbf{s}}, \cdot) \quad (5)$$

We follow some steps in the proof of Schölkopf et al. [2001]. They consider arbitrary functions  $c$  mapping to  $\mathbb{R} \cup \{\infty\}$  of the form

$$c((\mathbf{s}_1, y_1, V(\mathbf{s}_1)), \dots, (\mathbf{s}_m, y_m, V(\mathbf{s}_m))), \quad (6)$$

which typically defines an error function of function  $V(\mathbf{s})$  on the samples  $\mathbf{s}_i$  with desired output  $y_i$ . In our case, we do not have desired output values  $y_i$  for our objective function. This is inconsequential as  $c$  can be arbitrary, and so can be independent of all  $y$  values.

Any function  $V$  can be written as  $V = \sum_{\tilde{\mathbf{s}} \in \tilde{\mathcal{S}}} \alpha_{\tilde{\mathbf{s}}} k_{\tilde{\mathbf{s}}}(\tilde{\mathbf{s}}, \cdot) + v(\mathbf{s})$ , where  $v(\mathbf{s})$  is an additional bias term. If  $V$  is constrained to be in the Hilbert space defined by  $k$ , Schölkopf et al. [2001] show that  $c$  is independent of the bias term  $v(\mathbf{s})$ . This means that for any optimal  $V'$  that is not of the proposed form, there is a  $V^*$  of the proposed form that has the same objective value which is obtained by subtracting  $v(\mathbf{s})$  from  $V'$ .

As the dual function  $g$  satisfies the conditions to cost function  $c$ , for us this means that there is at least one  $V^*$  optimizing  $g$  of the proposed form. Note that it is inconsequential that the dual  $g$  also depends on Lagrangian parameter  $\eta$ . For any optimum  $(\eta^*, V'^*)$ , if  $V'^*$  is not of the proposed form, the projection  $V^*$  of  $V'^*$  on the proposed basis satisfies  $g(\eta^*, V'^*) = g(\eta^*, V^*)$ , so  $(\eta^*, V^*)$  must be an optimum as well.
